# Supplementary material for: Fingolimod reduces circulating tight-junction protein levels and in vitro peripheral blood mononuclear cells migration in multiple sclerosis patients
Source: Springer Nature journal article supplement (doi:10.1038/s41598-018-33672-9), 2018-10-12

**Supplementary information for:**

**Fingolimod reduces circulating tight-junction protein levels and in vitro peripheral blood mononuclear cells migration in multiple sclerosis patients**

PASQUALE ANNUNZIATA\*, CHIARA CIONI, GIANNI MASI, MARISTELLA TASSI<sup>°</sup>,  
GIUSEPPE MAROTTA<sup>°</sup>, SAURO SEVERI<sup>°°</sup>

Department of Medicine, Surgery and Neurosciences, University of Siena, Italy

<sup>°</sup> Stem Cell Transplant and Cellular Therapy Unit, University Hospital, Siena, Italy

<sup>°°</sup> Neurology Unit, San Donato Hospital, Arezzo, Italy

**\*Corresponding author:**

Pasquale Annunziata, MD

Dipartimento di Scienze Mediche, Chirurgiche e Neuroscienze

Università di Siena

Unità di Neuroimmunologia clinica

Viale Bracci, 2

53100 SIENA, ITALY

Tel.: +39-0577-233482

### Supplementary Table S1

Correlation between serum tight-junction protein levels and clinical and MRI features

---

|              | <b>RR at baseline</b> | <b>RR at T<sub>12</sub></b> | <b>EDSS at baseline</b> | <b>EDSS at T<sub>12</sub></b> | <b>New MRI T2-weighted lesions</b> | <b>MRI T1 GAD<sup>+</sup> lesions</b> |
|--------------|-----------------------|-----------------------------|-------------------------|-------------------------------|------------------------------------|---------------------------------------|
| <b>OCLN</b>  | 0.01                  | 0.34                        | -0.25                   | -0.27                         | -0.25                              | -0.14                                 |
| <b>CLN-5</b> | -0.02                 | 0.18                        | -0.31                   | -0.39                         | 0.12                               | -0.12                                 |
| <b>ZO-1</b>  | -0.04                 | -0.14                       | 0.32                    | 0.23                          | -0.05                              | -0.23                                 |

RR = relapse rate; T<sub>12</sub> = at 12 months of therapy; EDSS = expanded disability status scale; GAD<sup>+</sup> = gadolinium enhancing lesions; OCLN = occludin; CLN-5 = claudin-5; ZO-1 = zonula occludens -1. The results are expressed as r values. Spearman rank correlation was calculated. No r value is statistically significant.

**Supplementary Figure S1:** Representative ELISA standard curves of recombinant occludin (OCLN) (A), claudin-5 (CLN-5) (B) and zonula occludens-1 (ZO-1) (C). O.D. = optical density.

**Supplementary Figure S2:** Titration ELISA curves of recombinant occludin (OCLN) (A), claudin-5 (CLN-5) (B) and zonula occludens-1 (ZO-1) (C). O.D. = optical density. NHS = normal healthy subjects. MS = multiple sclerosis. The results are expressed as mean absorbance values (read at 490 nm wavelength)  $\pm$ SEM of triplicate values of serum samples from 2 NHS and 2 MS patients. In all curves, background absorbance values obtained omitting serum samples were subtracted to the absorbance values of serum samples.

**Supplementary Figure S3:** Competitive ELISA of respective tight-junction proteins in the presence of increasing concentrations of occludin (OCLN) or bovine serum albumin (BSA) (A), of claudin-5 (CLN-5) or BSA (B) and of zonula occludens-1 (ZO-1) or BSA (C). O.D. = optical density. Each point is the mean of triplicate values.

Supplementary Figure S1

A

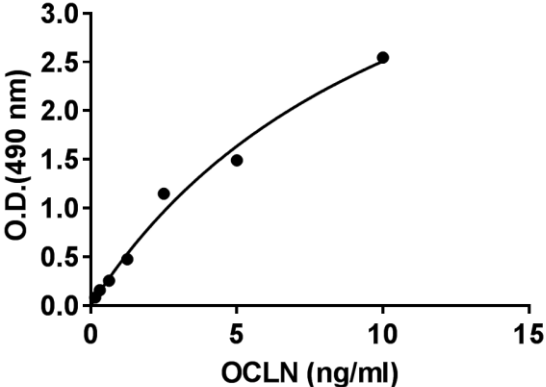

B

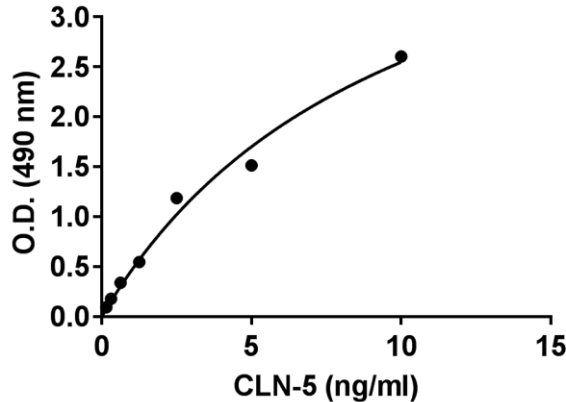

C

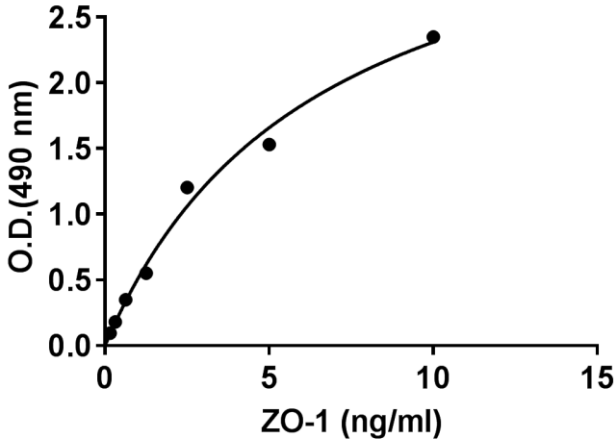

Supplementary Figure S2

A

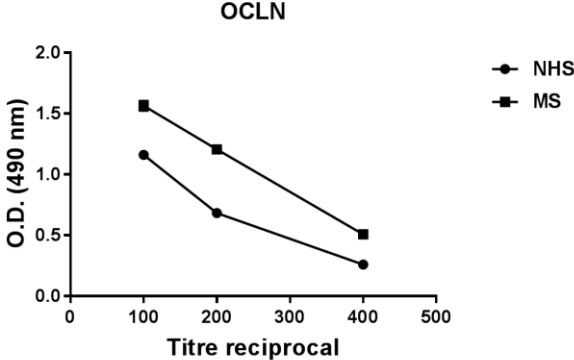

B

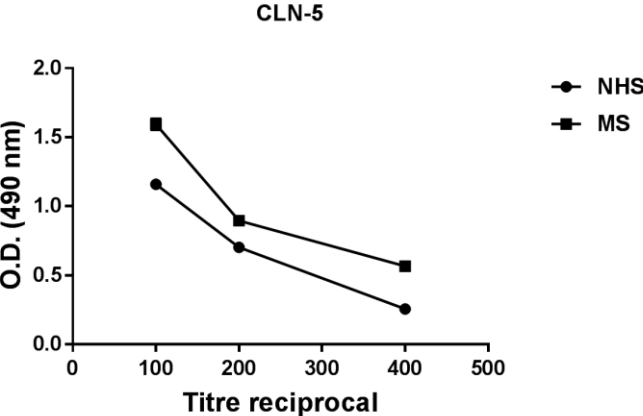

C

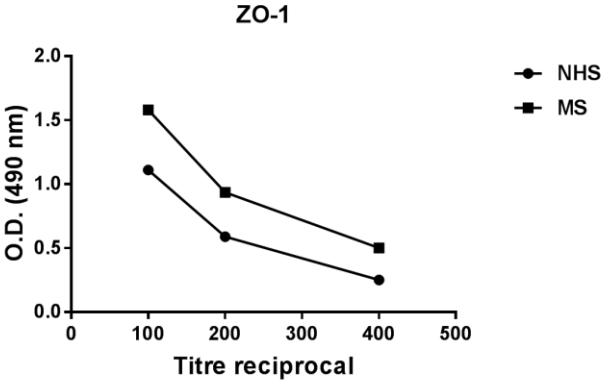

Supplementary Figure S3

A

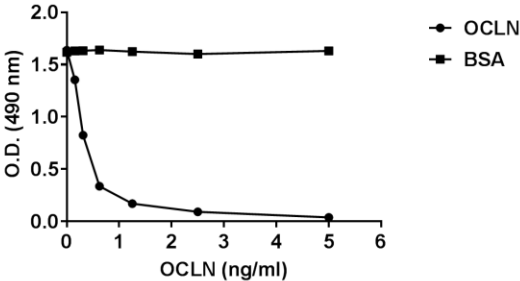

B

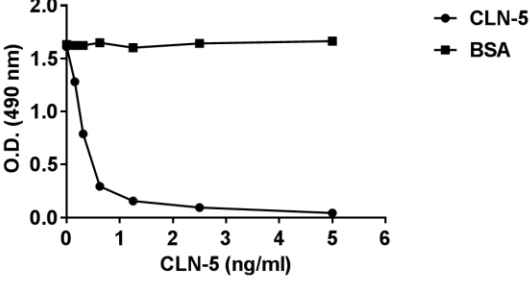

C

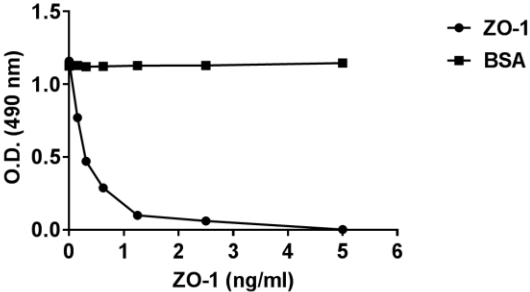

Supplement: 41598_2018_33672_MOESM1_ESM.pdf [file 41598_2018_33672_MOESM1_ESM.pdf]
